# Supplementary material
Source: PubMed Central journal article supplement (PMC9080054)
Supplement: mmc1.pdf [file mmc1.pdf]

**Supplemental information**

**Longitudinal analyses reveal distinct immune  
response landscapes in lung and intestinal  
tissues from SARS-CoV-2-infected rhesus macaques**

**Huiwen Zheng, Yanli Chen, Jing Li, Heng Li, Xin Zhao, Jiali Li, Fengmei Yang, Yanyan Li, Changkun Liu, Li Qin, Yuanyuan Zuo, Qian Zhang, Zhanlong He, Haijing Shi, Qihan Li, and Longding Liu**

**Supplemental information**

**Longitudinal analyses reveal distinct immune  
response landscapes in lung and intestinal  
tissues from SARS-CoV-2-infected rhesus macaques**

**Huiwen Zheng, Yanli Chen, Jing Li, Heng Li, Xin Zhao, Jiali Li, Fengmei Yang, Yanyan Li, Changkun Liu, Li Qin, Yuanyuan Zuo, Qian Zhang, Zhanlong He, Haijing Shi, Qihan Li, and Longding Liu**

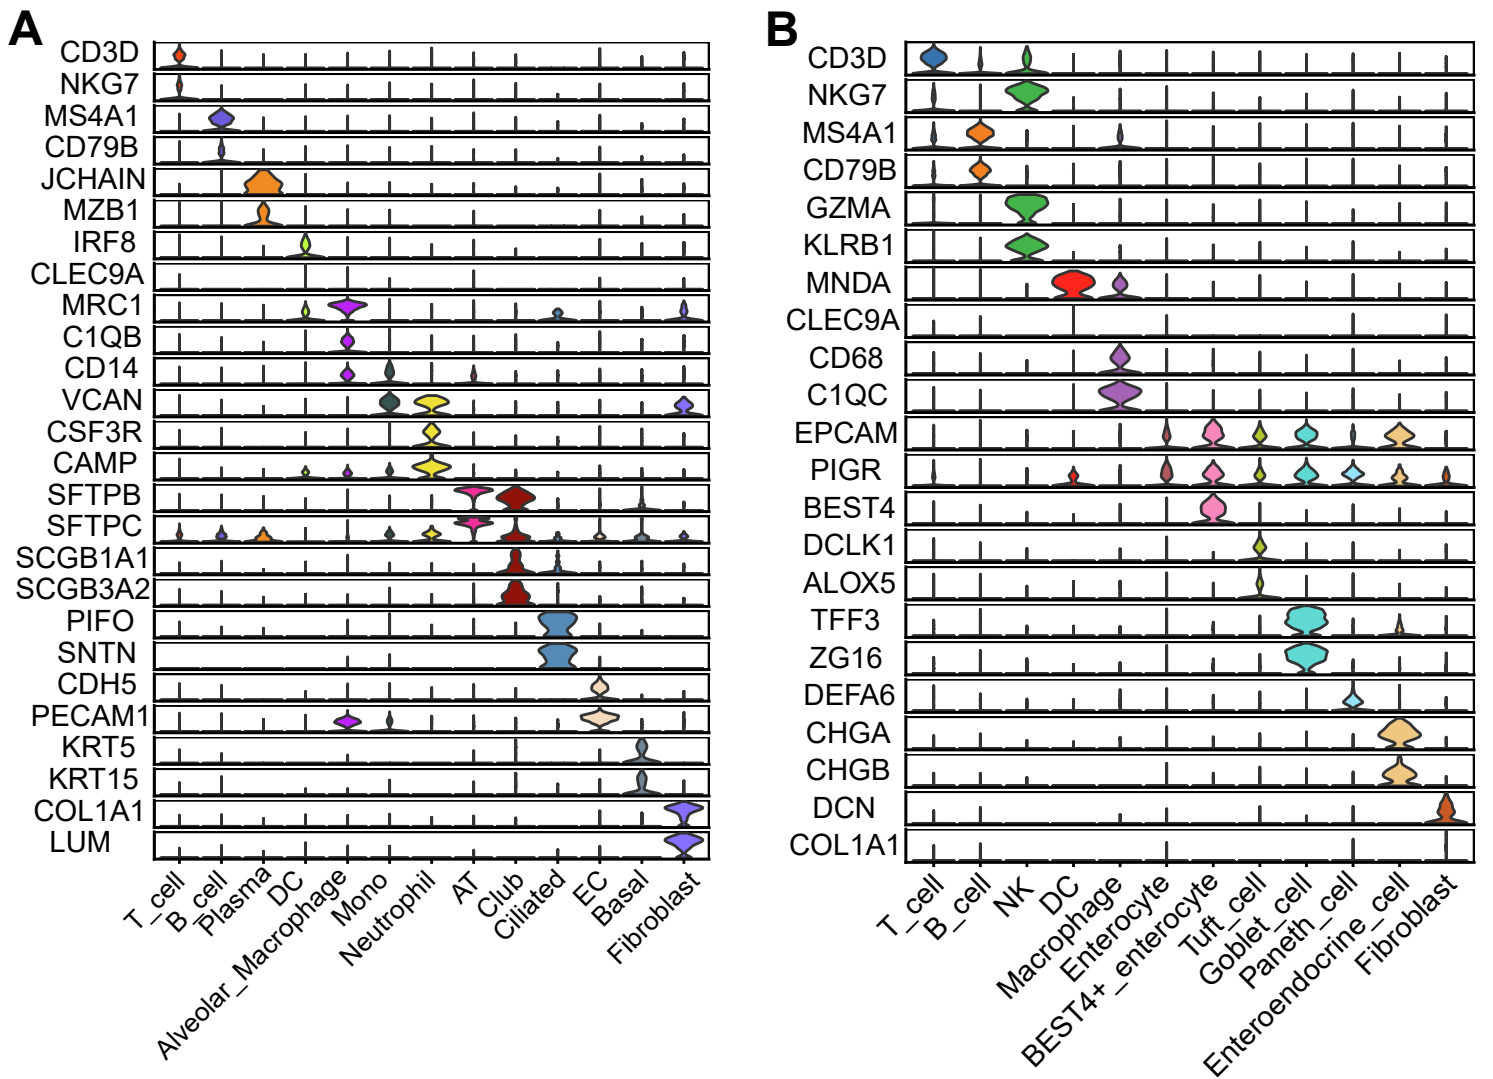

**Figure S1: Violin plots showing the expression of characteristic marker genes across cell clusters, related to Figure 2. (A) lung; (B) intestine; the x-axis represents the cell type, and the y-axis represents the normalized gene expression level.**

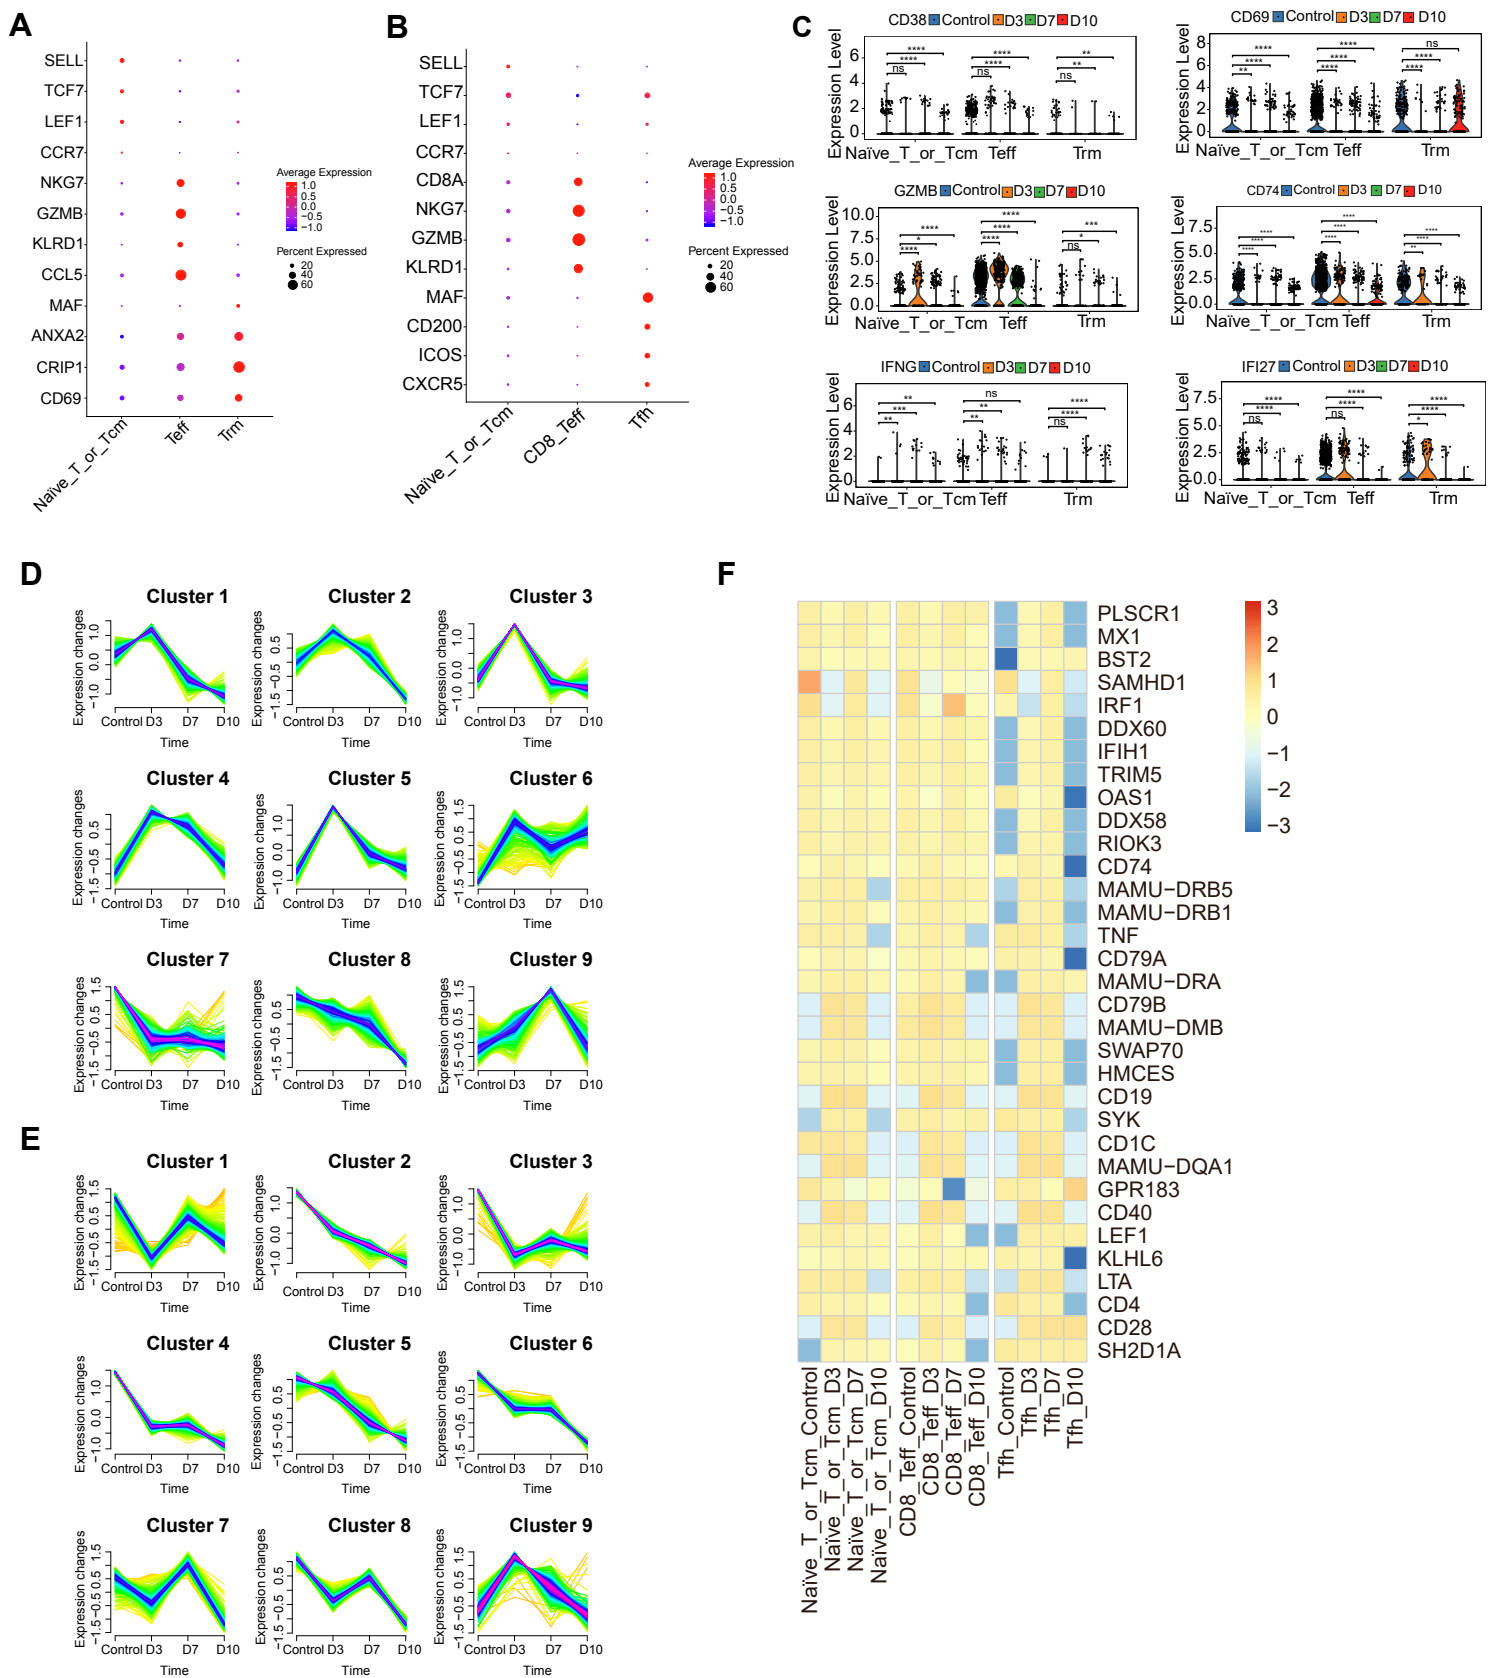

**Figure S2: The scRNA-seq dataset for SARS-CoV-2 infected T cell clusters, related to Figure 3.** (A) Violin plots showing marker genes of T-cell clusters in the lung. The y-axis represents the normalized gene expression value. (B) Violin plots showing marker genes of T-cell clusters in the intestine. The y-axis represents the normalized gene expression value. (C) The differential expression levels of the T-cell activation-related genes CD38, CD69, GZMB, and CD74 and the interferon stimulation-related genes IFI27 and IFNG in infected samples at 3, 7, 10 dpi and normal control samples in the lung. \* $p < 0.05$ , \*\* $p < 0.01$ , \*\*\* $p < 0.001$ , \*\*\*\* $p < 0.0001$ , Wilcoxon test. (D) Time series analysis of genes of T cells clustered by expression pattern during the progression of SARS-CoV-2 infection in the lung with the mfuzz R package. (E) Time series analysis of genes of T cells clustered by expression pattern during the progression of SARS-CoV-2 infection in the small intestine with the mfuzz R package. (F) Heatmap of genes related with antiviral immune response at different times post-infection (3 dpi, 7 dpi and 10 dpi) in T cell subsets of intestine.

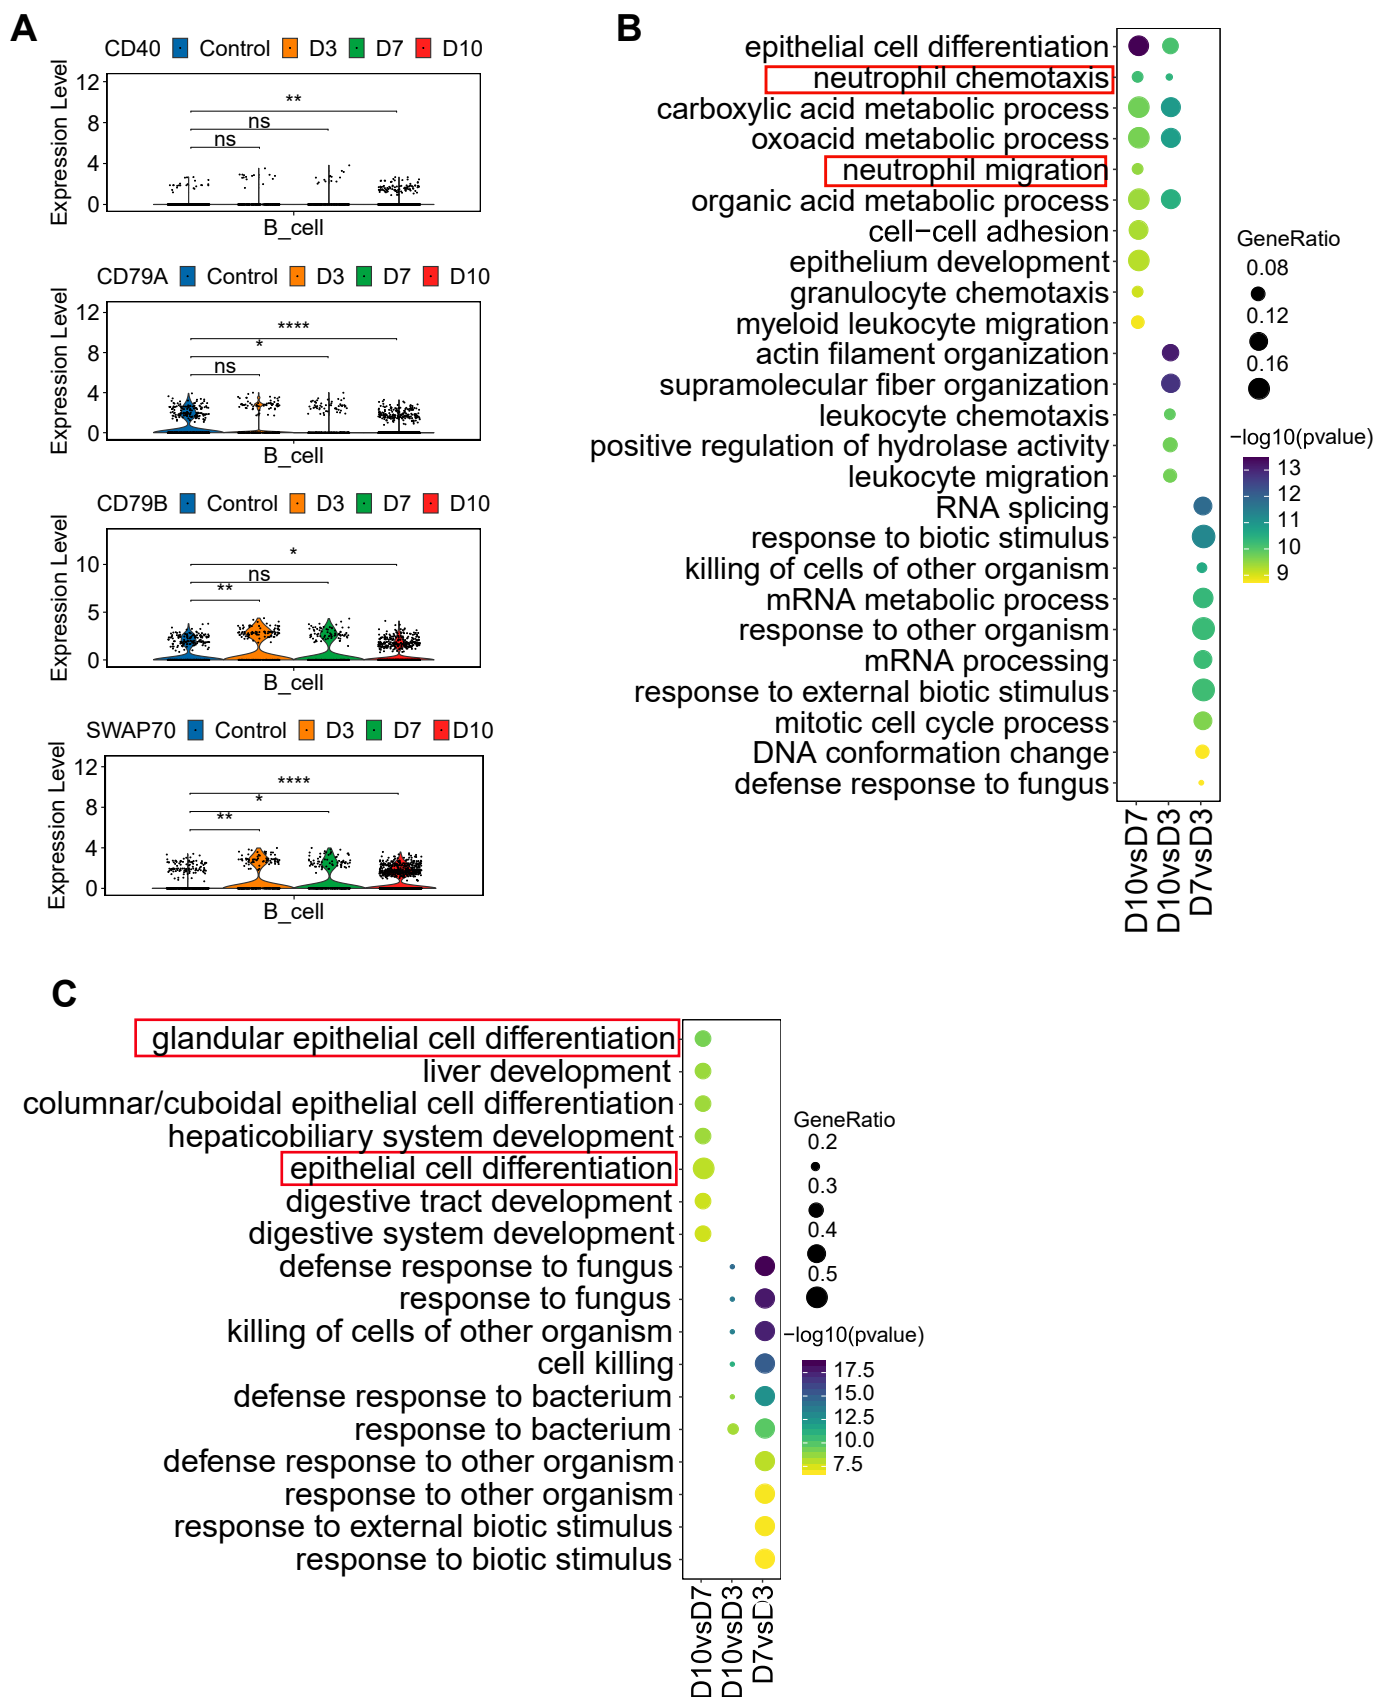

**Figure S3: The gene characteristics of infected-associated change in B and Paneth cells related to Figure 4.** (A) Violin plots showing activation-related marker genes of B-cell clusters in the lung. The y-axis represents the normalized gene expression value. Statistical analysis to compare the control with different infection timepoints (3 dpi, 7 dpi, and 10 dpi). \* $p < 0.05$ , \*\* $p < 0.01$ , \*\*\*\* $p < 0.0001$ , Wilcoxon test. (B-C) The top 10 up-enriched GO terms were revealed in SARS-CoV-2-infected macaques at 10 dpi vs. 3 dpi, 10 dpi vs. 7 dpi, and 7 dpi vs. 3 dpi across B-cell clusters(B) and Paneth cells(C) from the intestine.

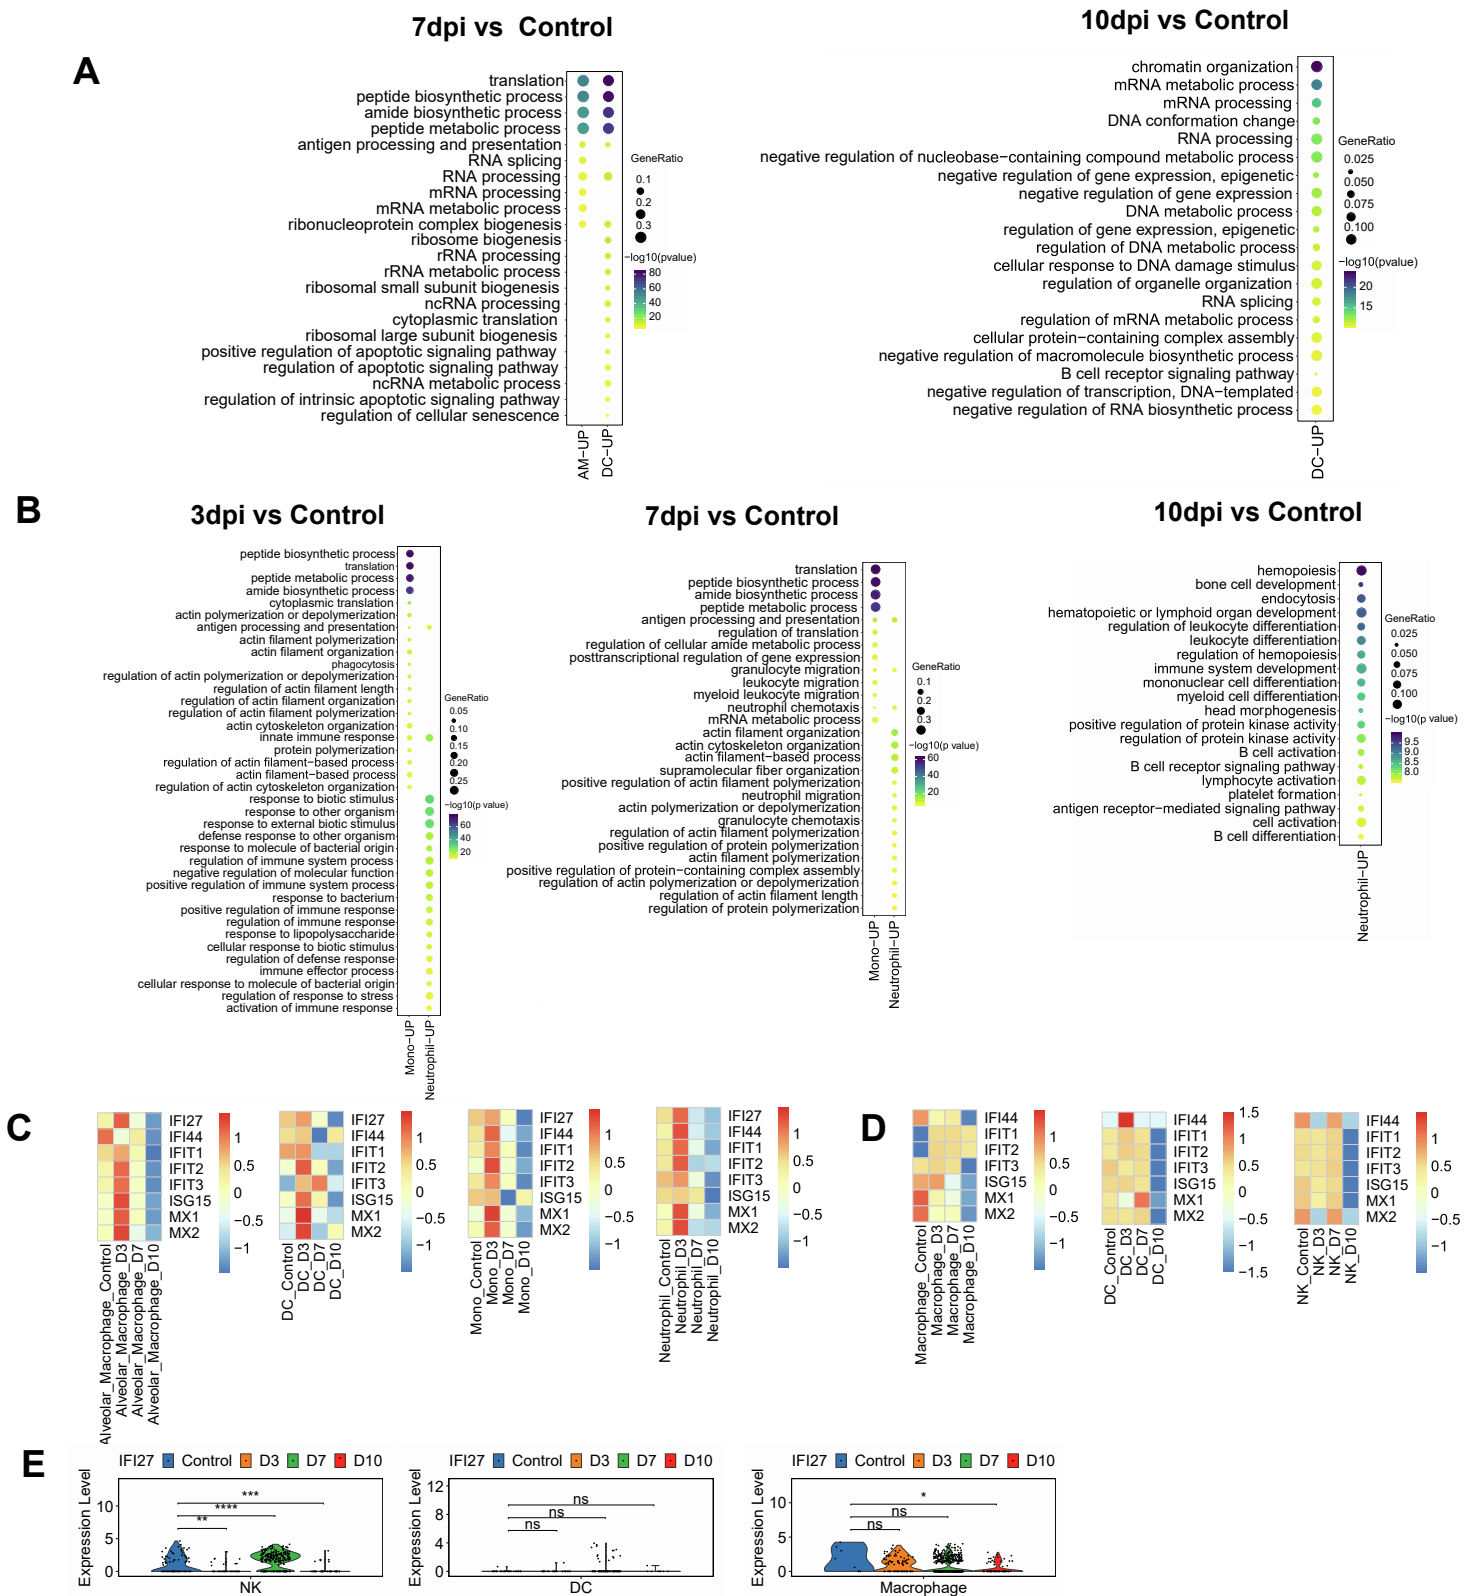

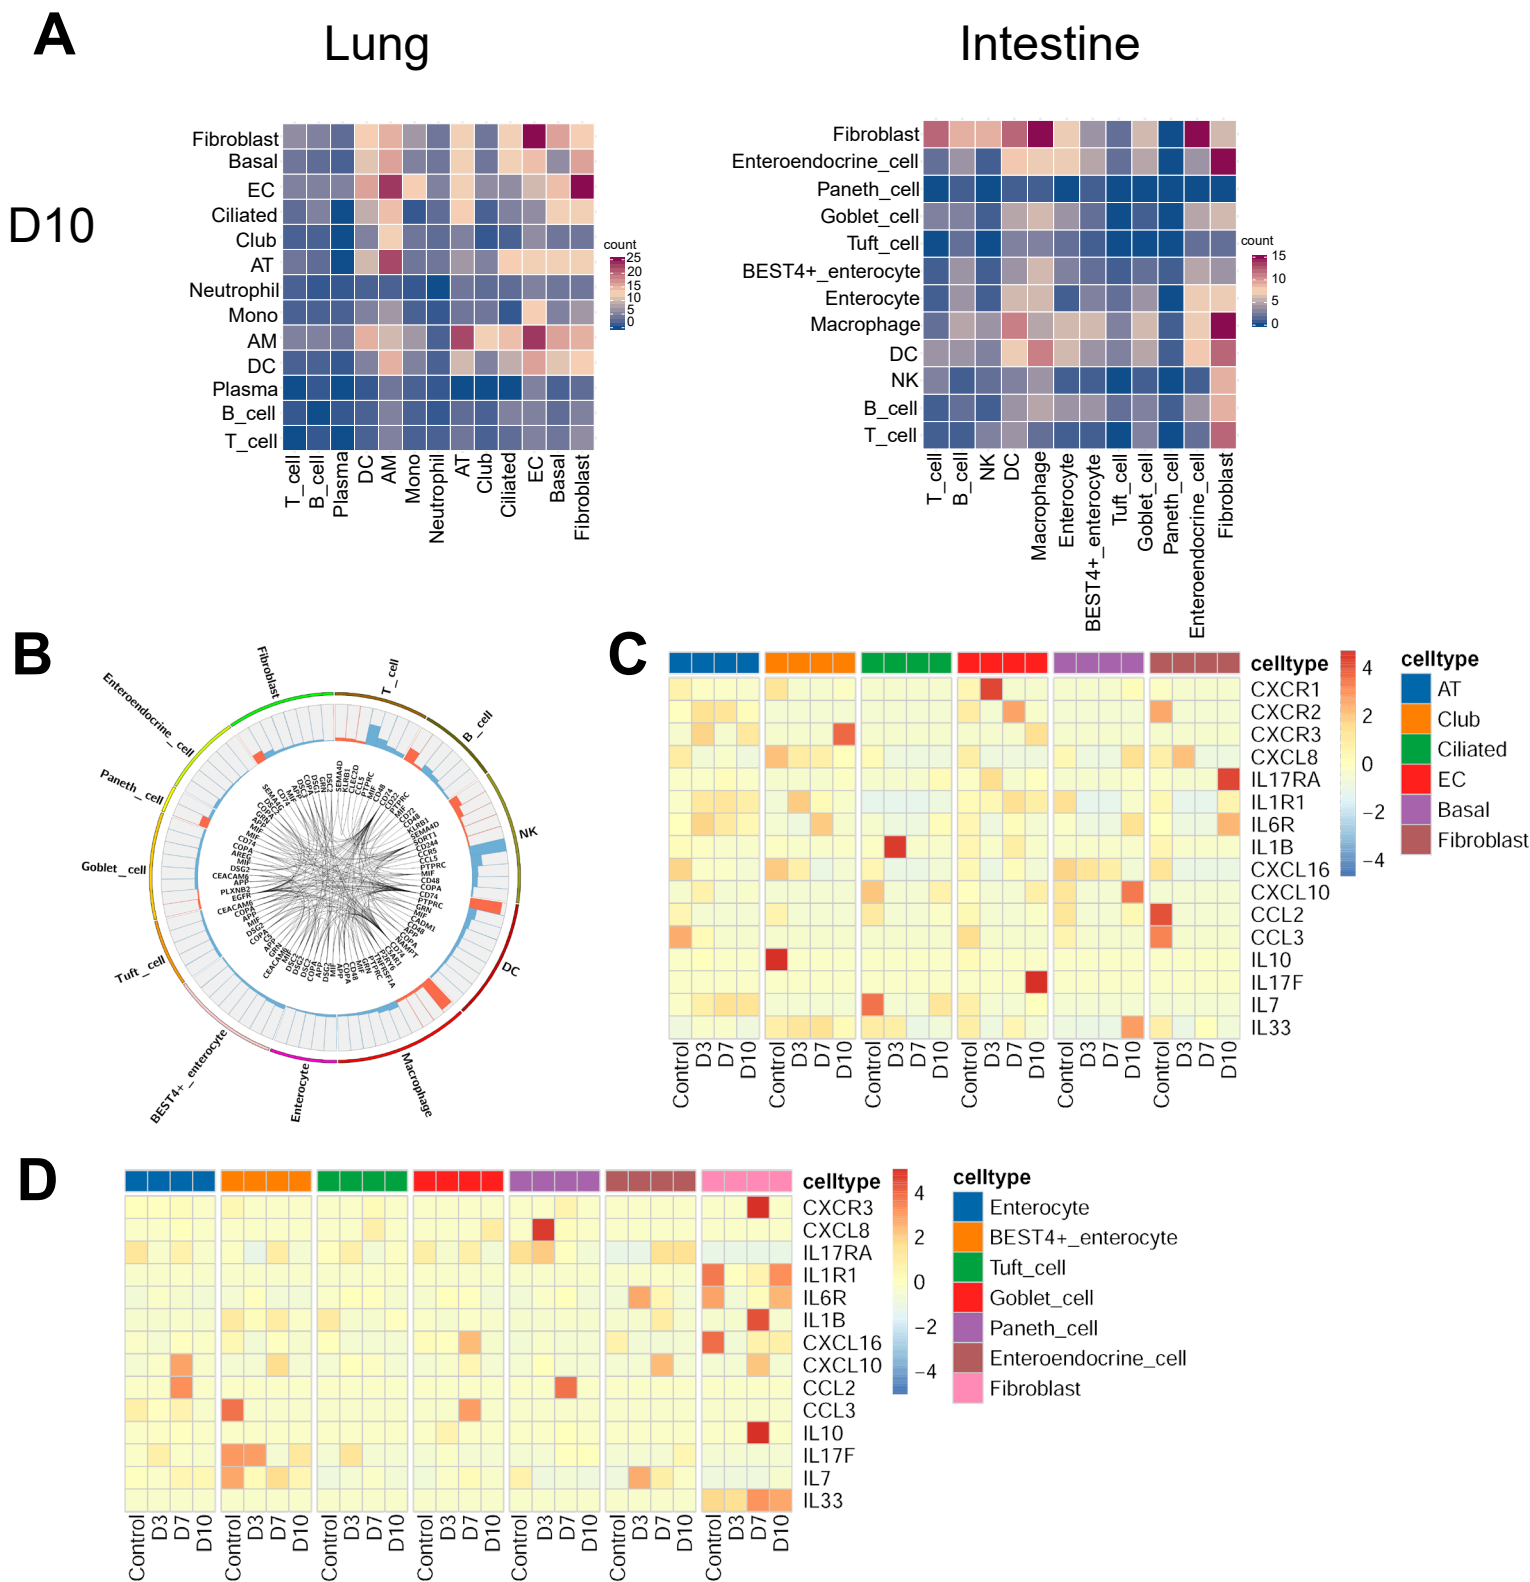

**Figure S5: Expression of chemokines, cytokines and receptor–ligand pairs genes in infected-associated tissues, related to Figure 7. (A) Cell–cell communication was identified by cell–phone DB at 10dpi vs. control sample for SARS-CoV-2–infected macaques in the lung and small intestinal tissue. The darker the color intensity is, the more pairs of receptor–ligand interactions there are between cells. (B) Analysis of receptor–ligand pairs across different cell clusters from the intestine of SARS-CoV-2–infected macaques at 3 dpi, 7 dpi and 10 dpi . All shown interactions were statistically significant based on a permutation test, and arrows denote directionality from ligand to receptor. The red bar represents the receptor, and the blue color bar represents the ligand. The height of the bar represents the average expression of the receptor or ligand gene. (C–D)Heatmap showing normalized average expression of the indicated chemokines and cytokines compared with normal controls with the scale function of pheatmap at 3, 7, and 10 dpi in tissue cells from the lung (C) and intestine (D).**

**Table S1: Clinical signs observed in rhesus macaques infected with SARS-CoV-2, related to Figure 1.**

| <b>Animal</b> | <b>Clinical signs observed 1 to 3 dpi</b>                                                        | <b>Clinical signs observed 4 to 7 dpi</b>                                                                                   | <b>Clinical signs observed 8 to 10 dpi</b>                                                                                   |
|---------------|--------------------------------------------------------------------------------------------------|-----------------------------------------------------------------------------------------------------------------------------|------------------------------------------------------------------------------------------------------------------------------|
| Rh1           | Normal appetite;<br>Normal and alert;<br><u>Moving without prompting;</u><br>Euthanized 3 dpi    | N/A                                                                                                                         | N/A                                                                                                                          |
| Rh2           | Normal appetite;<br>Normal and alert;<br>Moving without prompting;                               | Reduced appetite;<br>Slow/quiet, hunched,<br>but alert, interested;<br><u>Moving without prompting;</u><br>Euthanized 7 dpi | N/A                                                                                                                          |
| Rh3           | Normal appetite;<br>Slow/ quiet, hunched,<br>but alert, interested;<br>Moving without prompting; | Reduced appetite;<br>Slow/quiet, hunched,<br>but alert, interested;<br><u>Moving without prompting;</u><br>Euthanized 7 dpi | N/A                                                                                                                          |
| Rh4           | Normal appetite;<br>Slow/ quiet, hunched,<br>but alert, interested;<br>Moving without prompting; | Reduced appetite;<br>Quieter, hunched,<br>but alert, interested;<br>Moving without prompting;                               | Reduced appetite;<br>Slow/quiet, hunched,<br>but alert, interested;<br><u>Moving without prompting;</u><br>Euthanized 10 dpi |
| Rh5           | Normal appetite;<br>Slow/ quiet, hunched,<br>but alert, interested;<br>Moving without prompting; | Reduced appetite;<br>Quieter, hunched,<br>but alert, interested;<br>Moving without prompting;                               | Reduced appetite;<br>Slow/quiet, hunched,<br>but alert, interested;<br><u>Moving without prompting;</u><br>Euthanized 10 dpi |

Animals were observed daily according to a standardized scoring sheet (Zheng et al., 2020a). N/A, not available.



**Table S2: The canonical markers of different kinds of cells in lung and small intestine, related to STAR Methods**

| <b>Intestinal tissue</b> |                         |
|--------------------------|-------------------------|
| T_cell                   | CD3D, NKG7              |
| B_cell                   | MS4A1, CD79B            |
| DC                       | MNDA, CLEC9A            |
| NK                       | GZMA, KLRB1             |
| Macrophage               | CD68, C1QC              |
| Enterocyte               | EPCAM, PIGR             |
| BEST4+_enterocyte        | BEST4                   |
| Tuft_cell                | DCLK1, ALOX5            |
| Paneth_cell              | DEFA6                   |
| Enteroendocrine_cell     | CHGA, CHGB              |
| Fibroblast               | DCN, COL1A1             |
| CD8_Teff                 | CD8A, NKG7, GZMB, KLRD1 |
| Tfh                      | MAF, CD200, ICOS, CXCR5 |
| Naïve_T_or_Tcm           | SELL, TCF7, LEF1, CCR7  |
| <b>Lung tissue</b>       |                         |
| T_cell                   | CD3D, NKG7              |
| B_cell                   | MS4A1, CD79B            |
| Plasma                   | JCHAIN, MZB1            |
| DC                       | IRF8, CLEC9A            |
| Alveolar_Macrophage      | CD68, C1QC              |
| Mono                     | CD14,VCAN               |
| Neutrophil               | CSF3R, CAMP             |
| AT                       | SFTPB, SFTPC            |
| Club                     | SCGB1A1, SCGB3A2        |
| Ciliated                 | PIFO, SNTN              |
| EC                       | CDH5, PECAM1            |
| Basal                    | KRT5, KRT15             |
| Fibroblast               | COL1A1, LUM             |
| Teff                     | NKG7, GZMB, KLRD1, CCL5 |
| Naïve_T_or_Tcm           | SELL, TCF7, LEF1, CCR7  |
| Trm                      | MAF, ANXA2, CRIP1, CD69 |
| cDC1                     | XCR1, CLEC9A            |
| cDC2                     | CD1C, FCER1A            |
| Mig_DC                   | LAMP3, CCR7             |
| pDC                      | LILRA4, TCF4            |
| Classical_mono           | CD14, VCAN, SELL        |
| Nonclassical_mono        | FCGR3                   |
| Type_I_Pneumocytes       | AGER, CAV1              |

|                     |                     |
|---------------------|---------------------|
| Type_II_Pneumocytes | SFTPb, SFTPC, LAMP3 |
|---------------------|---------------------|
